# Supplementary material
Source: ML conference proceedings conference paper supplement (https://openreview.net/forum?id=kW2u5szHb6)
Supplement: supplementary_material [file Supplementary Material.pdf › Supplementary Material/Supplementary Material.pdf]

## 1 Per-Class Performance Comparison on Human3.6M

We conduct extensive experiments on the Human3.6M dataset, which encompasses 13 diverse action categories including Directions, Discussion, Eating, Greeting, Phoning, Photo, Posing, Purchases, Sitting, SittingDown, Smoking, Waiting, Walking, WalkDog, and WalkTogether. Table 1 presents a detailed comparison of our method against several state-of-the-art approaches across all action categories. From Table 1, it can be observed that our method demonstrates strong performance in terms of both ADE and FDE across a wide range of action categories. In particular, our approach achieves significant improvements on two walking-related actions — Walking and WalkTogether — where precise motion prediction is crucial. This indicates the model’s enhanced ability to capture and forecast dynamic motion patterns, especially in scenarios involving coordinated or continuous movement.

## 2 Wavelet guided masked fusion module

The detailed structure of our proposed Wavelet-guided masked fusion module is shown in Fig 1. The module consists of a hierarchical arrangement of two distinct layer types. The lower section comprises  $N$  local fusion layers, each built with a sophisticated architecture incorporating CrossAttn, SelfAttn, and FFN components. Within these local fusion layers, the cross-attention mechanism facilitates information exchange between frequency domain features and masked vectors in the latent space, enabling effective multi-modal integration at a fine-grained level. The upper section contains  $N$  global context layers, constructed exclusively with self-attention mechanisms and feed-forward networks. These layers are specifically designed to consolidate global information, progressively refining representations to produce a condition vector  $z$  that encapsulates comprehensive contextual understanding. In our implementation, we set  $N = 6$ , creating a balanced architecture with sufficient capacity for both local feature fusion and global context integration.

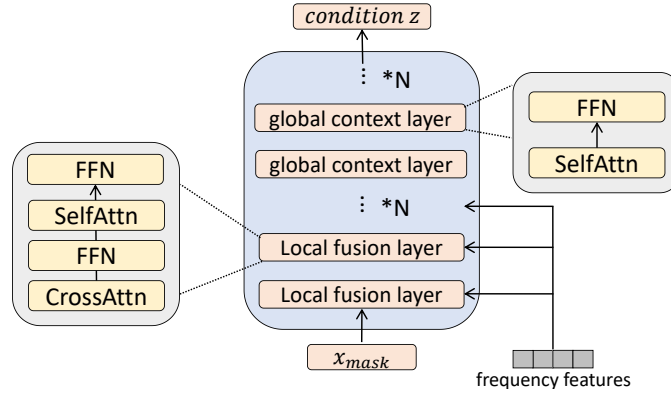

Figure 1: The detailed architecture of the Wavelet guided masked fusion module

## 3 More ablation study

In this part, we conduct additional ablation studies to further analyze the effectiveness of key components in our method. Specifically, we examine: (1) the impact of varying the number of layers in the masked fusion module, and (2) the design of the denoising steps within the diffusion process. For the first ablation study, we investigate how different configurations of local fusion layers and total layers affect model performance. As shown in Table 2, we systematically vary the number of local fusion layers (ranging from 4 to 12) while adjusting the total number of layers (ranging from 8 to 14). The results demonstrate that a proper configuration of these architectural components significantly impacts model performance. Specifically, the model achieves optimal performance on our task when using 6 local fusion layers within a total of 12 layers, yielding the best overall performance. For the second ablation study, we examine different noise schedule configurations on model performance and inference efficiency. Table 3 shows that reducing both noising steps during training and DDIM steps during inference to 10 maintains competitive performance while drastically



| Classes    |           | APD           | ADE          | FDE          | MMADE        | MMFDE        | Classes      |           | APD           | ADE          | FDE          | MMADE        | MMFDE        |
|------------|-----------|---------------|--------------|--------------|--------------|--------------|--------------|-----------|---------------|--------------|--------------|--------------|--------------|
| Directions | TPK       | 6.510         | 0.447        | 0.482        | 0.523        | 0.544        | Sitting      | TPK       | 6.417         | 0.400        | 0.547        | 0.461        | 0.548        |
|            | DLow      | 11.874        | 0.415        | 0.465        | 0.499        | 0.514        |              | DLow      | 11.425        | 0.364        | 0.513        | 0.440        | 0.523        |
|            | GSPS      | 15.398        | 0.407        | 0.477        | 0.492        | 0.522        |              | GSPS      | 14.966        | 0.323        | 0.454        | 0.411        | 0.484        |
|            | DivSamp   | <b>15.663</b> | 0.389        | 0.463        | 0.502        | 0.523        |              | DivSamp   | <b>15.614</b> | 0.317        | 0.465        | 0.417        | 0.490        |
|            | BelFusion | 7.090         | 0.378        | 0.422        | 0.484        | 0.494        |              | BelFusion | 6.495         | <u>0.306</u> | <u>0.446</u> | <b>0.400</b> | <b>0.461</b> |
|            | HumanMAC  | 6.357         | 0.391        | 0.456        | 0.475        | 0.475        |              | HumanMAC  | 5.941         | 0.312        | 0.456        | <u>0.404</u> | 0.472        |
|            | CoMusion  | 7.527         | 0.372        | <b>0.417</b> | <b>0.454</b> | <b>0.435</b> |              | CoMusion  | 6.237         | 0.307        | 0.448        | 0.406        | 0.468        |
|            | Ours      | 4.673         | <b>0.371</b> | <u>0.421</u> | <u>0.467</u> | <u>0.461</u> |              | Ours      | 4.080         | <b>0.302</b> | <b>0.443</b> | 0.437        | 0.492        |
| Discussion | TPK       | 6.966         | 0.511        | 0.581        | 0.570        | 0.600        | SittingDown  | TPK       | 7.393         | 0.496        | 0.678        | 0.531        | 0.666        |
|            | DLow      | 11.872        | 0.472        | 0.536        | 0.533        | 0.549        |              | DLow      | 12.044        | 0.451        | 0.605        | 0.495        | 0.606        |
|            | GSPS      | 14.099        | 0.448        | 0.541        | <u>0.526</u> | 0.563        |              | GSPS      | 13.725        | 0.406        | 0.561        | <b>0.461</b> | <b>0.565</b> |
|            | DivSamp   | <b>15.310</b> | 0.432        | 0.526        | 0.534        | 0.557        |              | DivSamp   | <b>14.899</b> | 0.413        | 0.579        | 0.478        | 0.586        |
|            | BelFusion | 9.172         | 0.420        | 0.507        | <b>0.512</b> | 0.530        |              | BelFusion | 9.026         | 0.413        | 0.585        | 0.468        | 0.587        |
|            | HumanMAC  | 7.496         | 0.434        | 0.533        | 0.547        | 0.571        |              | HumanMAC  | 6.871         | <u>0.381</u> | <b>0.530</b> | 0.471        | 0.568        |
|            | CoMusion  | 8.747         | 0.409        | <u>0.497</u> | 0.527        | <b>0.523</b> |              | CoMusion  | 7.253         | <b>0.378</b> | <u>0.546</u> | 0.472        | 0.578        |
|            | Ours      | 5.420         | <b>0.402</b> | <b>0.489</b> | 0.534        | 0.541        |              | Ours      | 4.993         | 0.395        | 0.581        | 0.504        | 0.589        |
| Eating     | TPK       | 6.412         | 0.388        | 0.473        | 0.452        | 0.472        | Smoking      | TPK       | 6.522         | 0.422        | 0.529        | 0.509        | 0.560        |
|            | DLow      | 11.603        | 0.358        | 0.433        | 0.439        | 0.452        |              | DLow      | 11.549        | 0.400        | 0.515        | 0.490        | 0.537        |
|            | GSPS      | <b>15.570</b> | 0.334        | 0.419        | 0.424        | 0.448        |              | GSPS      | 14.822        | 0.466        | 0.485        | 0.472        | 0.530        |
|            | DivSamp   | <u>15.681</u> | 0.321        | 0.419        | 0.428        | 0.445        |              | DivSamp   | <b>15.688</b> | 0.353        | 0.486        | 0.475        | 0.523        |
|            | BelFusion | 5.954         | 0.310        | 0.381        | 0.418        | 0.420        |              | BelFusion | 6.780         | 0.341        | 0.467        | 0.467        | 0.512        |
|            | HumanMAC  | 4.817         | 0.305        | 0.374        | <u>0.411</u> | <u>0.409</u> |              | HumanMAC  | 5.415         | 0.339        | 0.475        | <u>0.445</u> | 0.501        |
|            | CoMusion  | 6.149         | <b>0.295</b> | <b>0.366</b> | <b>0.408</b> | <b>0.395</b> |              | CoMusion  | 6.802         | <b>0.311</b> | <b>0.443</b> | <b>0.427</b> | <b>0.458</b> |
|            | Ours      | 3.461         | <u>0.303</u> | <u>0.371</u> | 0.420        | 0.413        |              | Ours      | 4.222         | <u>0.322</u> | <u>0.447</u> | 0.451        | <u>0.486</u> |
| Greeting   | TPK       | 6.779         | 0.555        | 0.615        | 0.571        | 0.598        | Waiting      | TPK       | 6.631         | 0.480        | 0.584        | 0.526        | 0.568        |
|            | DLow      | 11.897        | 0.530        | 0.590        | 0.561        | 0.564        |              | DLow      | 11.680        | 0.441        | 0.541        | 0.497        | 0.534        |
|            | GSPS      | 14.974        | 0.502        | 0.592        | <u>0.532</u> | 0.577        |              | GSPS      | 15.000        | 0.400        | 0.514        | <u>0.475</u> | 0.529        |
|            | DivSamp   | <b>15.447</b> | 0.489        | 0.575        | 0.535        | 0.562        |              | DivSamp   | <b>15.455</b> | 0.387        | 0.517        | 0.486        | 0.535        |
|            | BelFusion | 8.482         | 0.482        | <b>0.544</b> | <b>0.524</b> | <b>0.540</b> |              | BelFusion | 7.747         | 0.390        | 0.507        | <b>0.471</b> | <u>0.511</u> |
|            | HumanMAC  | 7.939         | 0.499        | 0.571        | 0.573        | 0.592        |              | HumanMAC  | 6.506         | 0.385        | 0.532        | 0.496        | 0.557        |
|            | CoMusion  | 8.946         | <u>0.481</u> | 0.556        | 0.558        | 0.552        |              | CoMusion  | 7.690         | <b>0.358</b> | <b>0.484</b> | 0.487        | <b>0.476</b> |
|            | Ours      | 5.444         | <b>0.473</b> | <u>0.551</u> | 0.554        | <u>0.551</u> |              | Ours      | 4.434         | <u>0.368</u> | <u>0.506</u> | 0.515        | 0.538        |
| Phoning    | TPK       | 6.410         | 0.377        | 0.475        | 0.468        | 0.507        | WalkDog      | TPK       | 7.384         | 0.560        | 0.694        | 0.592        | 0.665        |
|            | DLow      | 11.542        | 0.343        | 0.444        | 0.451        | 0.487        |              | DLow      | 11.882        | 0.490        | 0.566        | 0.539        | 0.570        |
|            | GSPS      | 15.050        | 0.311        | 0.413        | 0.436        | 0.476        |              | GSPS      | 13.746        | 0.459        | 0.564        | 0.530        | 0.587        |
|            | DivSamp   | <b>15.751</b> | 0.296        | 0.400        | 0.437        | 0.471        |              | DivSamp   | <b>15.616</b> | 0.439        | 0.555        | 0.532        | 0.577        |
|            | BelFusion | 6.649         | 0.283        | 0.375        | 0.426        | 0.445        |              | BelFusion | 9.335         | 0.432        | <b>0.530</b> | <u>0.527</u> | <u>0.569</u> |
|            | HumanMAC  | 5.069         | 0.287        | 0.383        | 0.405        | 0.431        |              | HumanMAC  | 7.741         | 0.441        | 0.547        | 0.543        | 0.591        |
|            | CoMusion  | 6.427         | <u>0.268</u> | <b>0.363</b> | <b>0.390</b> | <b>0.399</b> |              | CoMusion  | 9.154         | <b>0.426</b> | 0.540        | <b>0.520</b> | <b>0.554</b> |
|            | Ours      | 4.013         | <b>0.264</b> | <b>0.363</b> | 0.404        | <u>0.421</u> |              | Ours      | 5.823         | <u>0.431</u> | <u>0.536</u> | 0.566        | 0.601        |
| Photo      | TPK       | 6.894         | 0.541        | 0.689        | 0.548        | 0.633        | WalkTogether | TPK       | 6.718         | 0.443        | 0.548        | 0.535        | 0.573        |
|            | DLow      | 11.931        | 0.507        | 0.655        | 0.516        | 0.596        |              | DLow      | 11.951        | 0.395        | 0.495        | 0.503        | 0.530        |
|            | GSPS      | 14.310        | 0.485        | 0.663        | <u>0.502</u> | 0.606        |              | GSPS      | 15.030        | 0.316        | 0.440        | 0.473        | 0.516        |
|            | DivSamp   | <b>15.330</b> | 0.474        | 0.665        | 0.506        | 0.607        |              | DivSamp   | <b>16.095</b> | 0.321        | 0.458        | 0.486        | 0.525        |
|            | BelFusion | 8.446         | <u>0.434</u> | 0.601        | <b>0.462</b> | <b>0.546</b> |              | BelFusion | 6.378         | 0.296        | 0.393        | 0.484        | 0.495        |
|            | HumanMAC  | 7.505         | 0.438        | <u>0.600</u> | 0.511        | 0.619        |              | HumanMAC  | 4.336         | 0.298        | 0.387        | <u>0.447</u> | 0.454        |
|            | CoMusion  | 8.923         | <b>0.422</b> | 0.606        | 0.503        | 0.611        |              | CoMusion  | 6.512         | <u>0.270</u> | <u>0.372</u> | <b>0.435</b> | <b>0.431</b> |
|            | Ours      | 5.522         | 0.445        | <b>0.591</b> | 0.531        | 0.590        |              | Ours      | 4.128         | <b>0.256</b> | <b>0.357</b> | 0.449        | <u>0.451</u> |
| Posing     | TPK       | 6.520         | 0.466        | 0.538        | 0.542        | 0.565        | Walking      | TPK       | 6.708         | 0.455        | 0.533        | 0.538        | 0.558        |
|            | DLow      | 11.875        | 0.442        | 0.521        | 0.510        | <u>0.525</u> |              | DLow      | 11.904        | 0.428        | 0.518        | 0.516        | 0.539        |
|            | GSPS      | 15.149        | 0.415        | 0.527        | 0.498        | 0.543        |              | GSPS      | 14.797        | 0.351        | 0.469        | 0.490        | 0.528        |
|            | DivSamp   | <b>15.429</b> | 0.395        | 0.499        | 0.510        | 0.541        |              | DivSamp   | <b>15.964</b> | 0.373        | 0.535        | 0.508        | 0.547        |
|            | BelFusion | 8.438         | 0.406        | 0.510        | <u>0.498</u> | 0.531        |              | BelFusion | 5.116         | 0.367        | 0.471        | 0.530        | 0.546        |
|            | HumanMAC  | 7.320         | 0.407        | 0.530        | 0.512        | 0.553        |              | HumanMAC  | 4.306         | 0.321        | 0.447        | 0.472        | 0.485        |
|            | CoMusion  | 8.236         | <u>0.393</u> | <u>0.501</u> | <b>0.492</b> | <b>0.499</b> |              | CoMusion  | 6.487         | <u>0.308</u> | <u>0.443</u> | <b>0.447</b> | <b>0.465</b> |
|            | Ours      | 5.143         | <b>0.389</b> | <b>0.497</b> | 0.532        | 0.537        |              | Ours      | 3.522         | <b>0.263</b> | <b>0.406</b> | 0.452        | 0.474        |
| Purchases  | TPK       | 7.450         | 0.505        | 0.522        | 0.535        | 0.538        |              |           |               |              |              |              |              |
|            | DLow      | 11.947        | 0.430        | 0.422        | <b>0.493</b> | 0.477        |              |           |               |              |              |              |              |
|            | GSPS      | 13.969        | 0.414        | 0.429        | 0.497        | 0.497        |              |           |               |              |              |              |              |
|            | DivSamp   | <b>14.967</b> | <b>0.388</b> | <b>0.404</b> | 0.502        | 0.478        |              |           |               |              |              |              |              |
|            | BelFusion | 10.272        | 0.410        | <u>0.409</u> | <u>0.494</u> | 0.472        |              |           |               |              |              |              |              |
|            | HumanMAC  | 8.601         | <u>0.403</u> | 0.410        | 0.506        | <u>0.439</u> |              |           |               |              |              |              |              |
|            | CoMusion  | 9.484         | 0.405        | 0.426        | 0.496        | <b>0.425</b> |              |           |               |              |              |              |              |
|            | Ours      | 5.185         | <u>0.403</u> | 0.421        | 0.542        | 0.460        |              |           |               |              |              |              |              |

Table 1: Comparison of different methods on various classes and metrics.



reducing computational costs compared to larger step configurations. This demonstrates our approach can maintain high prediction accuracy even with a significantly accelerated sampling process, making it more practical for real-time applications.

| local_layer | total_layer | APD↑         | ADE↓         | FDE↓         | MMADE↓       | MMFDE↓       |
|-------------|-------------|--------------|--------------|--------------|--------------|--------------|
| 4           | 8           | <b>5.013</b> | 0.372        | 0.484        | 0.529        | 0.542        |
| 5           | 10          | 4.766        | 0.361        | 0.467        | 0.515        | <b>0.533</b> |
| 6           | 12          | 4.458        | <b>0.347</b> | <b>0.452</b> | <b>0.513</b> | 0.535        |
| 12          | 12          | 4.229        | 0.354        | 0.461        | 0.520        | 0.536        |
| 7           | 14          | 4.587        | 0.362        | 0.458        | 0.522        | 0.540        |

Table 2: Performance comparison with different configurations of local fusion layers and total layers.

39

| Noising steps | DDIM steps | APD↑         | ADE↓         | FDE↓         | MMADE↓       | MMFDE↓       |
|---------------|------------|--------------|--------------|--------------|--------------|--------------|
| 1000          | 100        | <b>5.172</b> | 0.350        | 0.454        | 0.518        | <b>0.533</b> |
| 100           | 10         | 4.574        | 0.363        | 0.468        | 0.520        | 0.536        |
| 10            | 10         | 4.458        | <b>0.347</b> | <b>0.452</b> | <b>0.513</b> | 0.535        |

Table 3: Experiment results of the ablation study on diffusion steps

## 4 More visualization results

To further illustrate the effectiveness of our model, we provide a variety of qualitative results in the supplementary materials. Specifically, the included ZIP file contains several animated GIF sequences showcasing motion predictions generated by our model across different action categories. These visualizations highlight the model’s ability to generate smooth, realistic, and temporally coherent motion, and offer an intuitive understanding of its performance beyond numerical metrics.
